# Supplementary material for: Pestalotiopols E–J, Six New Polyketide Derivatives from a Marine Derived Fungus Pestalotiopsis sp. SWMU-WZ04-1
Source: MDPI journal article supplement (doi:10.3390/md22010015), 2023-12-26
Supplement: s1 [file s1]

## Supporting Information

**Pestalotiopsis E-J, Six New Polyketide Derivatives from a Marine Derived Fungus**

***Pestalotiopsis* sp. SWMU-WZ04-1**

Liyuan Jiang <sup>1</sup>, Baorui Teng <sup>1</sup>, Mengyu, Zhang <sup>1</sup>, Siwei Chen <sup>1</sup>, Dan Zhang <sup>1</sup>,

Longfei Zhai <sup>2</sup>, Jiafu Lin <sup>3,\*</sup>, Hui Lei <sup>1\*</sup>

<sup>1</sup> *School of Pharmacy, Southwest Medical University, Luzhou 646000, China,*

<sup>2</sup> *Antibiotics Research and Re-evaluation Key Laboratory of Sichuan Province, Sichuan Industrial Institute of Antibiotics, Chengdu University, Chengdu 610106, China,*

<sup>3</sup> *School of Pharmacy, Chengdu University, Chengdu 610106, China,*

**Corresponding author.**

E-mail addresses: linjiafu@cdu.edu.cn (J.L.); huilei@swmu.edu.cn (H.L.)

|                               |                                |                      |                      |
|-------------------------------|--------------------------------|----------------------|----------------------|
| <b>Sample Type</b>            | Sample                         | <b>Position</b>      | P1-A4                |
| <b>Instrument Name</b>        | Instrument 1                   | <b>User Name</b>     |                      |
| <b>Acq Method</b>             | default-20211008-pos.m         | <b>Acquired Time</b> | 9/11/2023 8:48:22 AM |
| <b>IRM Calibration Status</b> | Some Ions Missed               | <b>DA Method</b>     | 2023.m               |
| <b>Comment</b>                |                                |                      |                      |
| <b>Sample Group</b>           | <b>Info.</b>                   |                      |                      |
| <b>Acquisition SW</b>         | 6200 series TOF/6500           |                      |                      |
| <b>Version</b>                | series Q-TOF B.05.00 (B5042.0) |                      |                      |

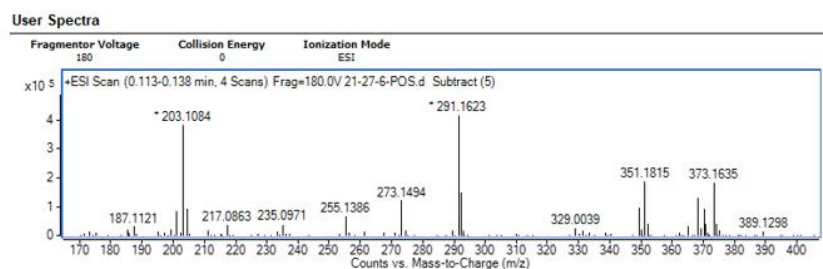

**Figure S1** HRESI-MS spectrum of the compound **1**

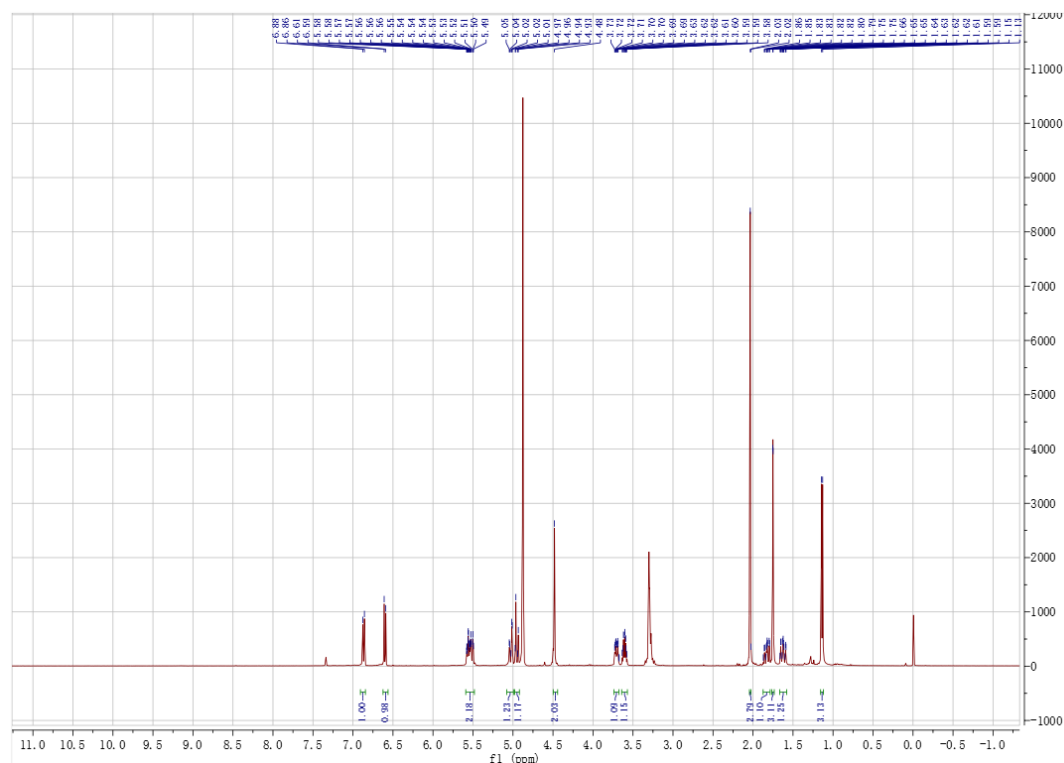

**Figure S2**  $^1\text{H}$  NMR (600 MHz,  $\text{CD}_3\text{OD}$ ) spectrum of the compound **1**

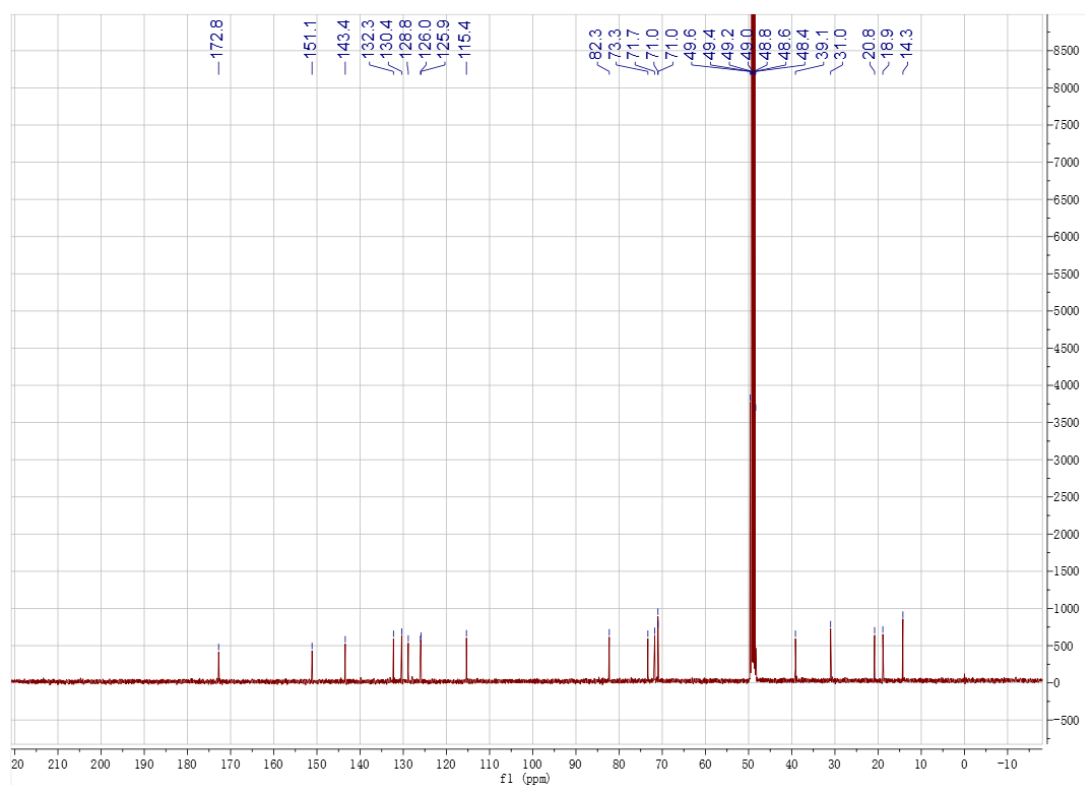

**Figure S3** <sup>13</sup>C NMR (150 MHz, CD<sub>3</sub>OD) spectrum of the compound **1**

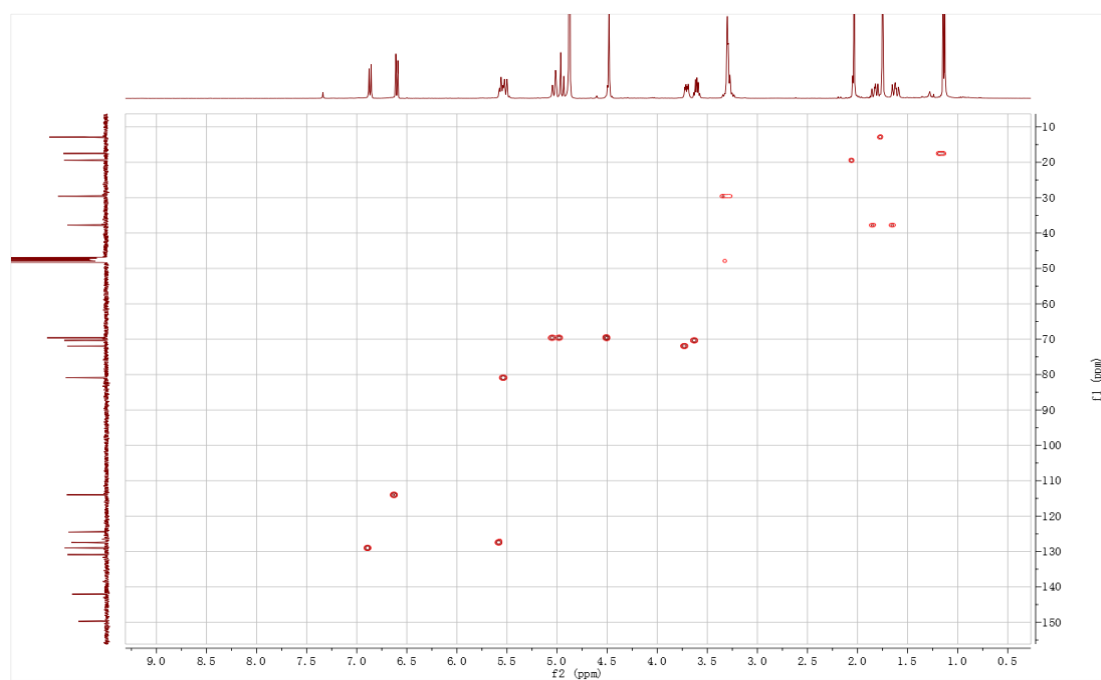

**Figure S4** HSQC spectrum of the compound **1** (CD<sub>3</sub>OD)

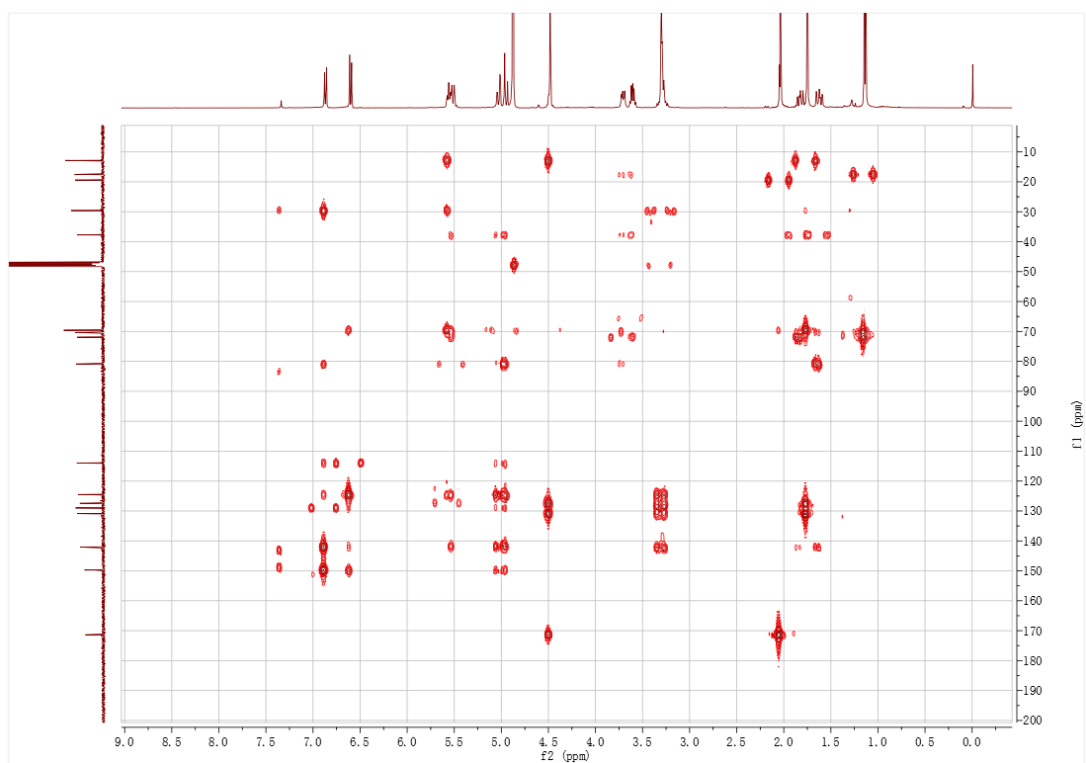

**Figure S5** HMBC spectrum of the compound **1**(CD<sub>3</sub>OD)

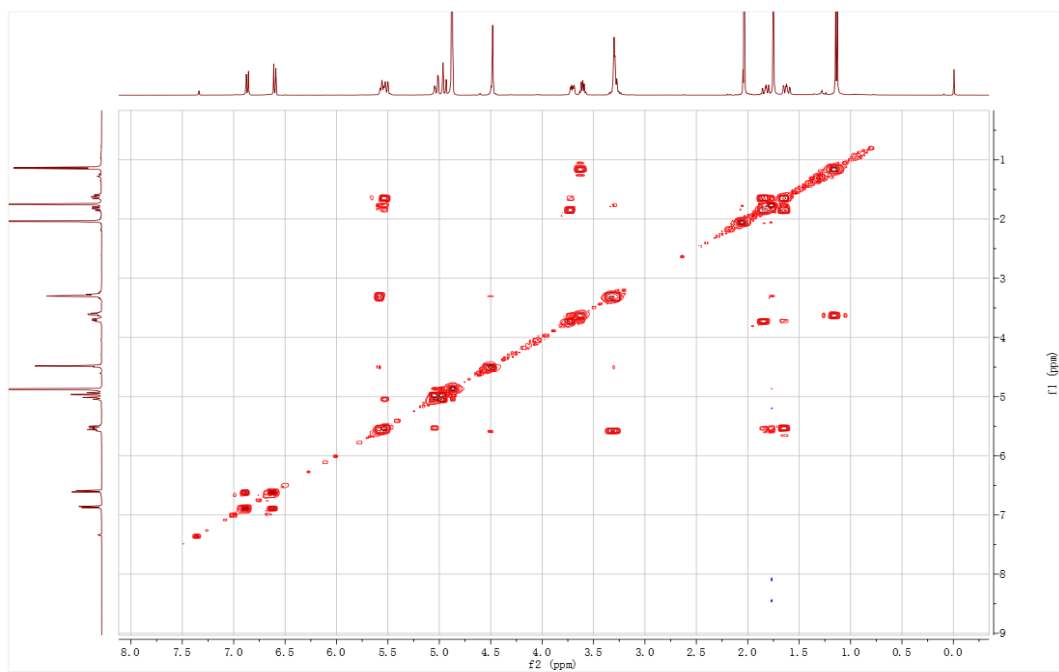

**Figure S6** COSY spectrum of the compound **1**(CD<sub>3</sub>OD)

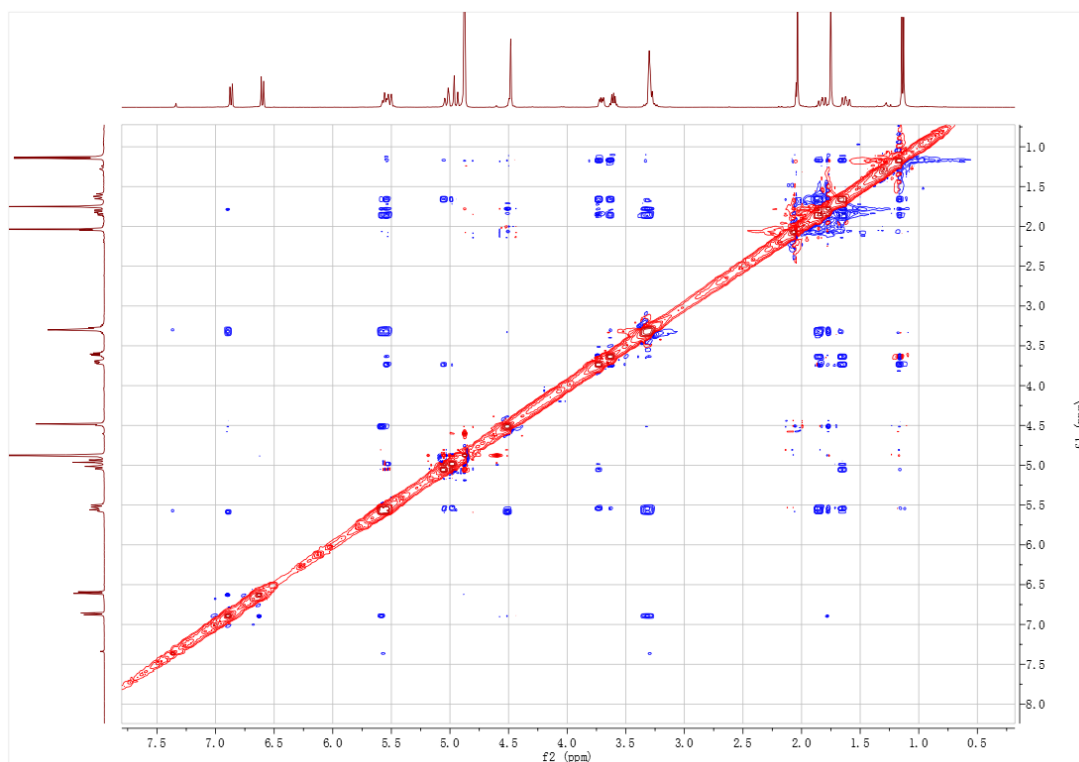

**Figure S7** NOESY spectrum of the compound **1**(CD<sub>3</sub>OD)

|                               |                             |                      |                      |
|-------------------------------|-----------------------------|----------------------|----------------------|
| <b>Sample Type</b>            | Sample                      | <b>Position</b>      | P1-A3                |
| <b>Instrument Name</b>        | Instrument 1                | <b>User Name</b>     |                      |
| <b>Acq Method</b>             | default-20211008-pos.m      | <b>Acquired Time</b> | 9/11/2023 8:46:32 AM |
| <b>IRM Calibration Status</b> | Some Ions Missed            | <b>DA Method</b>     | 2023.m               |
| <b>Comment</b>                |                             |                      |                      |
| <b>Sample Group</b>           |                             | <b>Info.</b>         |                      |
| <b>Acquisition SW</b>         | 6200 series TOF/6500 series |                      |                      |
| <b>Version</b>                | Q-TOF B.05.00 (B5042.0)     |                      |                      |

#### User Spectra

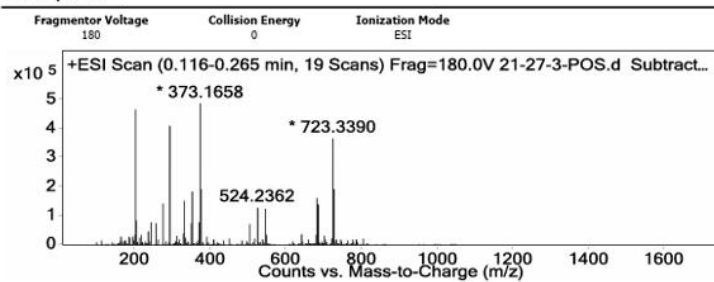

**Figure S8** HRESI-MS spectrum of the compound **2**

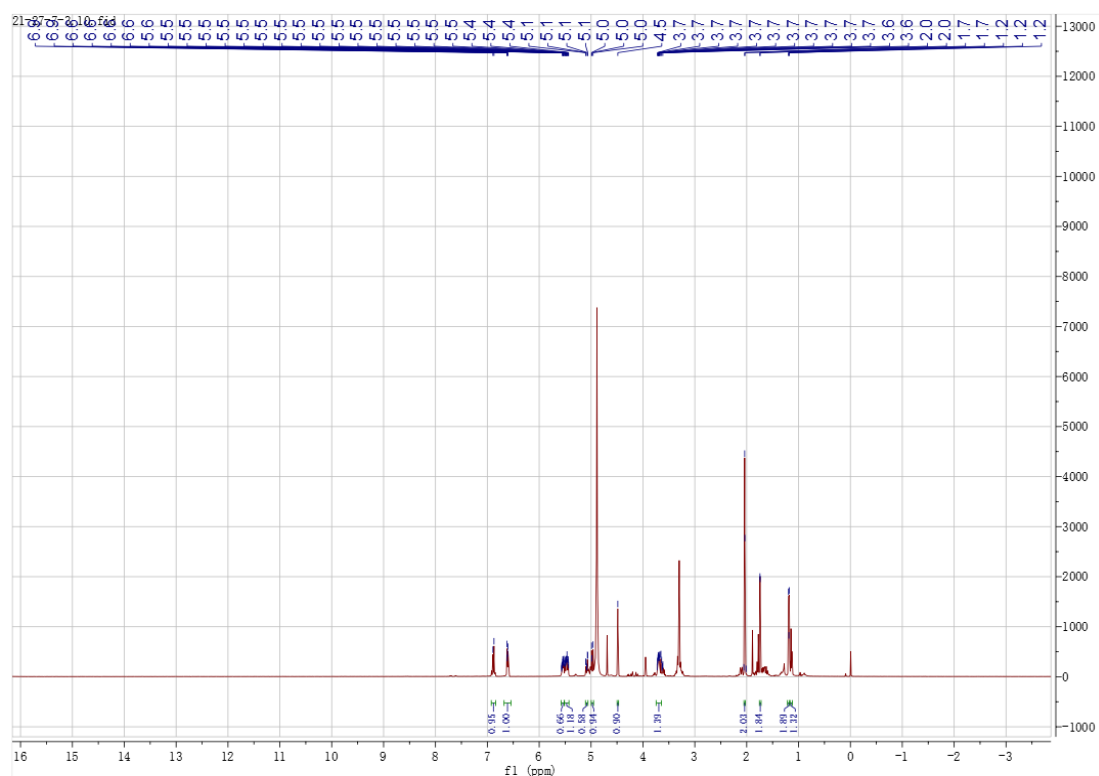

**Figure S9** <sup>1</sup>H NMR (600 MHz, CD<sub>3</sub>OD) spectrum of the compound **2**

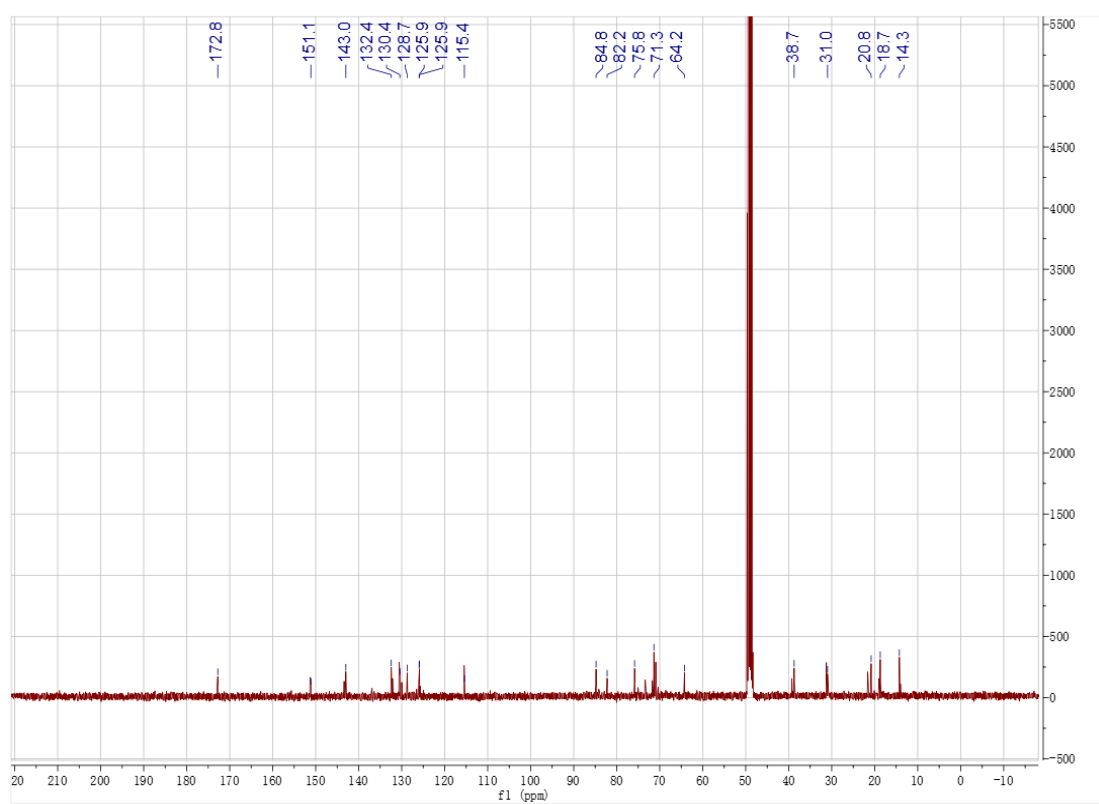

**Figure S10** <sup>13</sup>C NMR (150 MHz, CD<sub>3</sub>OD) spectrum of the compound **2**

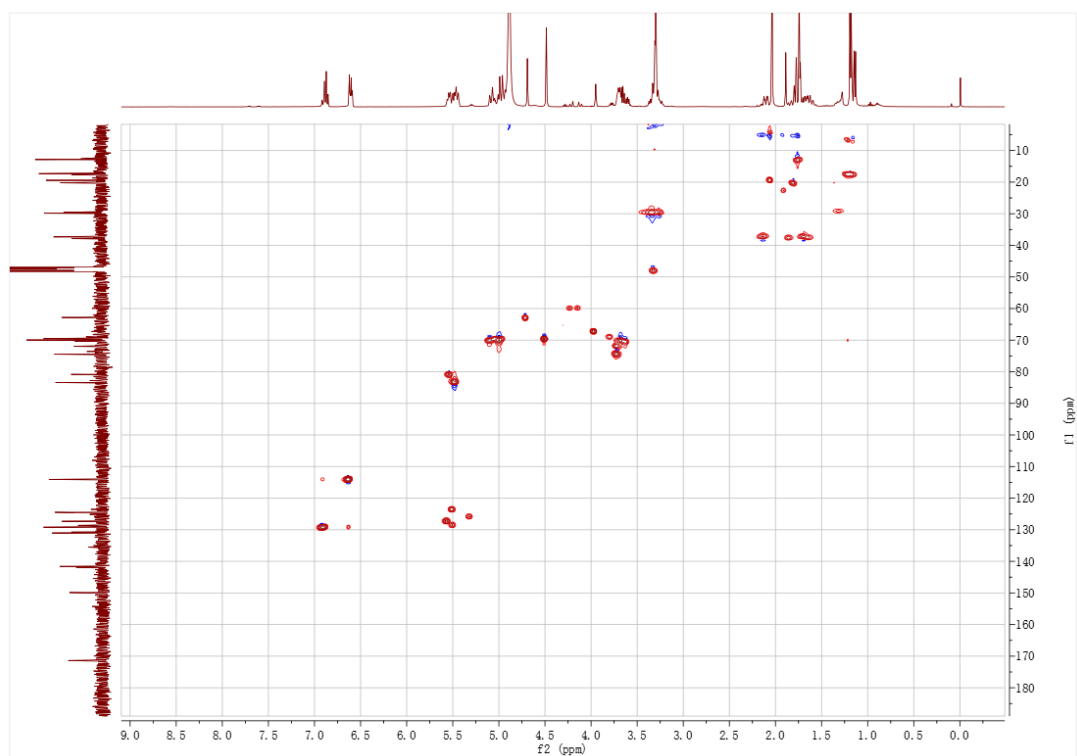

**Figure S11** HSQC spectrum of the compound **2** (CD<sub>3</sub>OD)

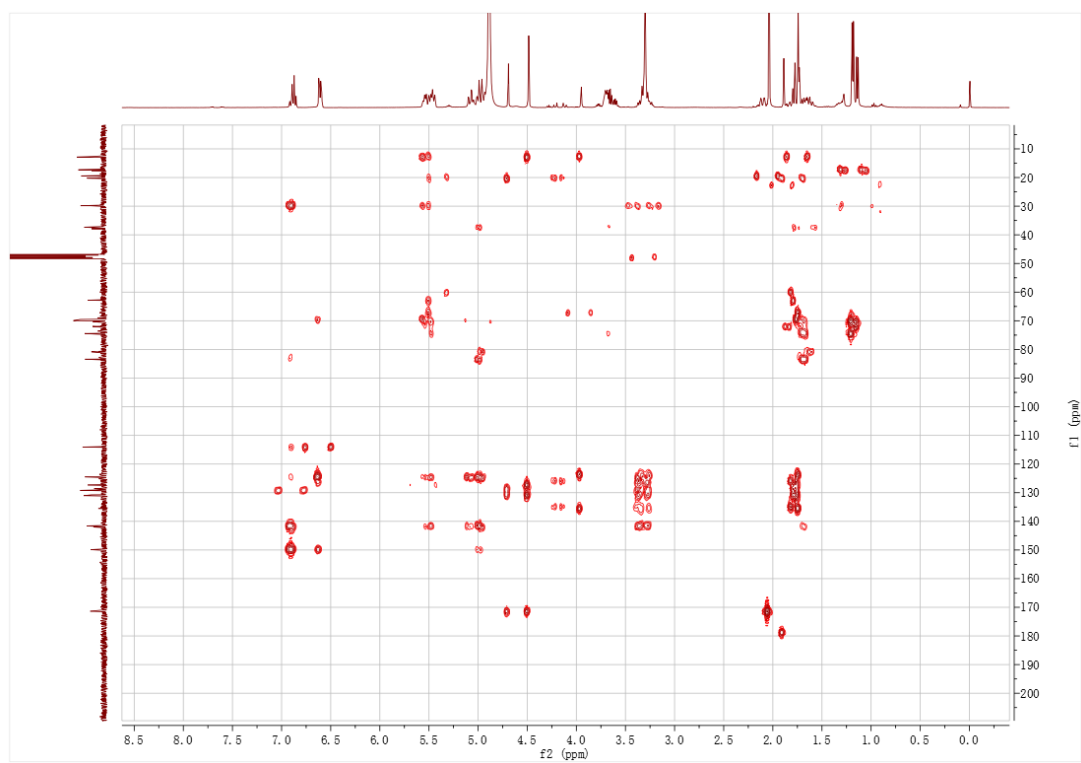

**Figure S12** HMBC spectrum of the compound **2** (CD<sub>3</sub>OD)

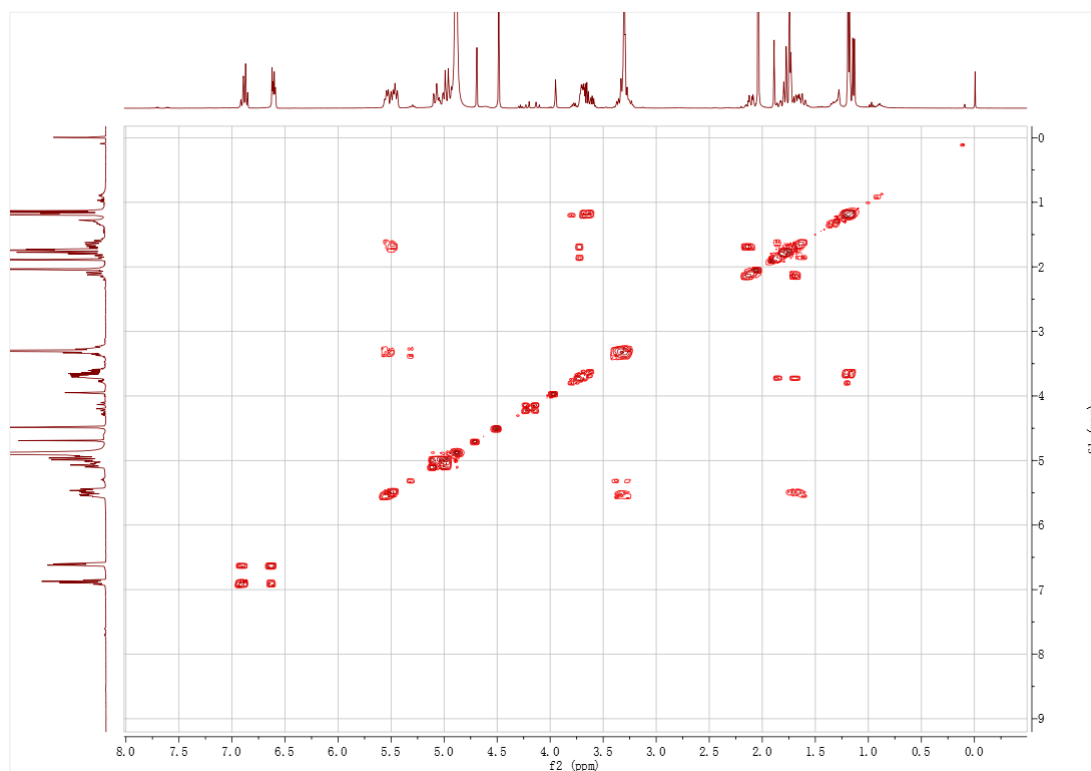

**Figure S13** COSY spectrum of the compound **2** (CD<sub>3</sub>OD)

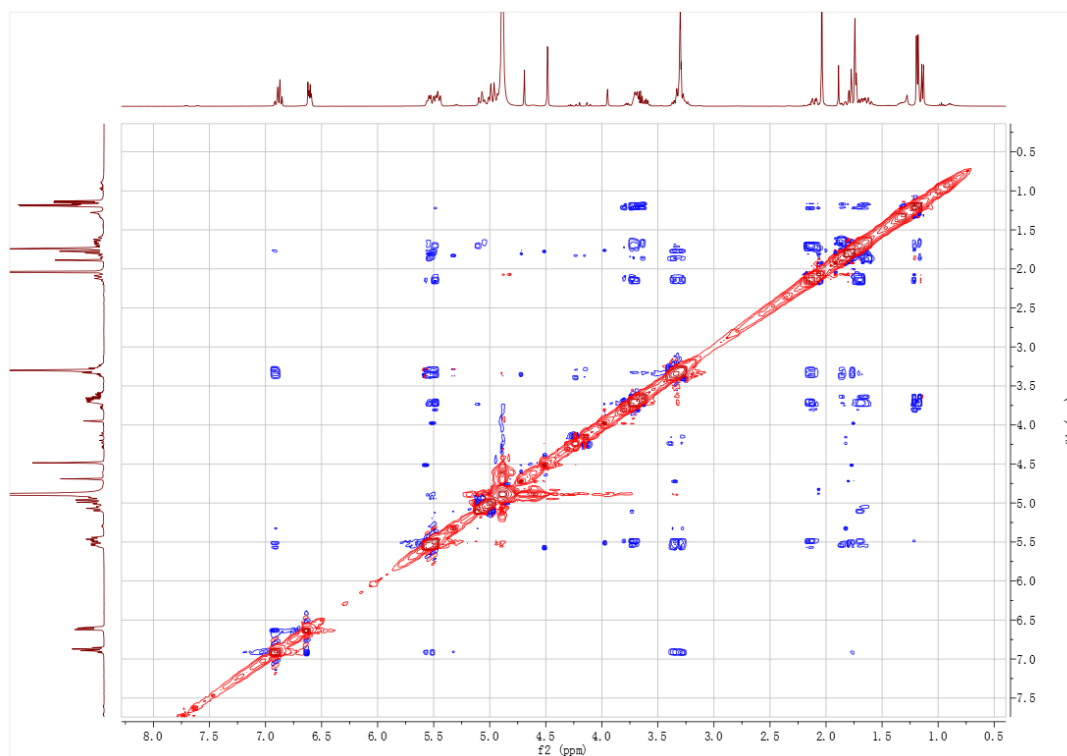

**Figure S14** NOESY spectrum of the compound **2** (CD<sub>3</sub>OD)



|                               |                                   |                      |                      |
|-------------------------------|-----------------------------------|----------------------|----------------------|
| <b>Instrument Name</b>        | Instrument 1                      | <b>User Name</b>     |                      |
| <b>Acq Method</b>             | default-20211008-neg.m            | <b>Acquired Time</b> | 9/11/2023 8:54:04 AM |
| <b>IRM Calibration Status</b> | Some Ions Missed                  | <b>DA Method</b>     | 2023.m               |
| <b>Comment</b>                |                                   |                      |                      |
| <b>Sample Group</b>           |                                   | <b>Info.</b>         |                      |
| <b>Acquisition SW</b>         | 6200 series TOF/6500              |                      |                      |
| <b>Version</b>                | series Q-TOF B.05.00<br>(B5042.0) |                      |                      |

#### User Spectra

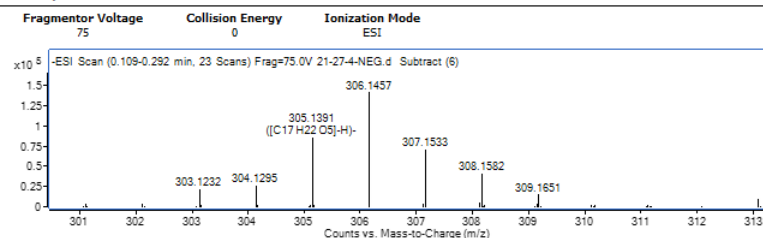

**Figure S15** HRESI-MS spectrum of the compound **3**

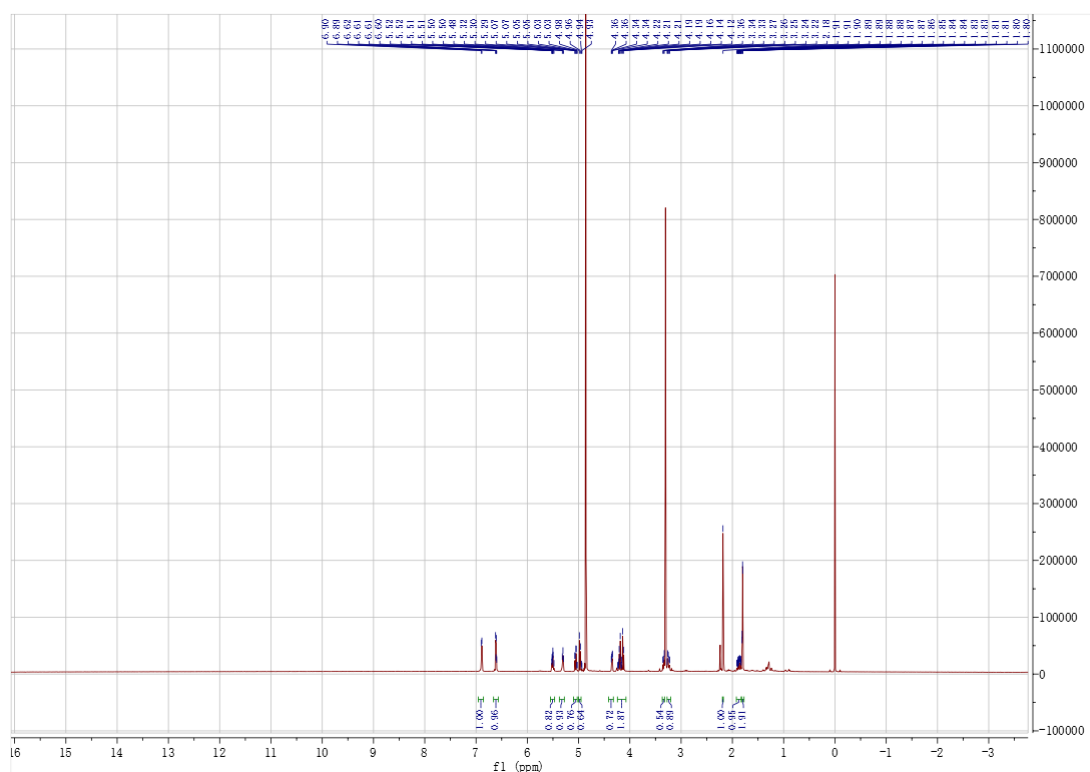

**Figure S16**  $^1\text{H}$  NMR (600 MHz,  $\text{CD}_3\text{OD}$ ) spectrum of the compound **3**

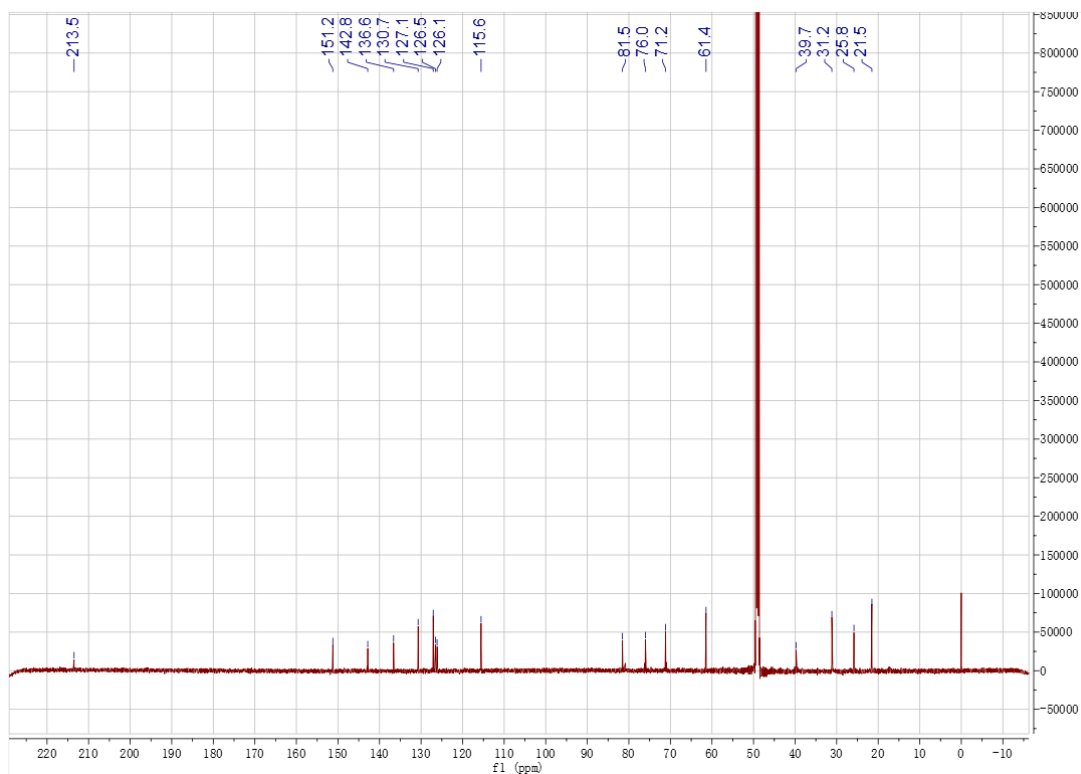

**Figure S17**  $^{13}\text{C}$  NMR (150 MHz,  $\text{CD}_3\text{OD}$ ) spectrum of the compound **3**

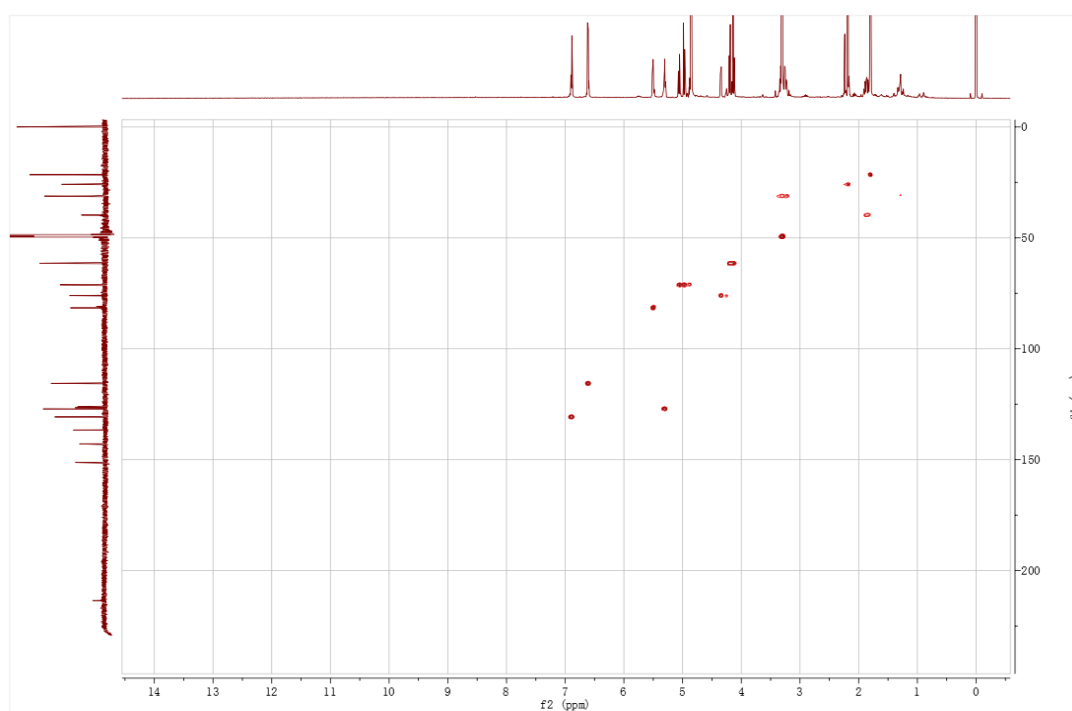

**Figure S18** HSQC spectrum of the compound **3** ( $\text{CD}_3\text{OD}$ )

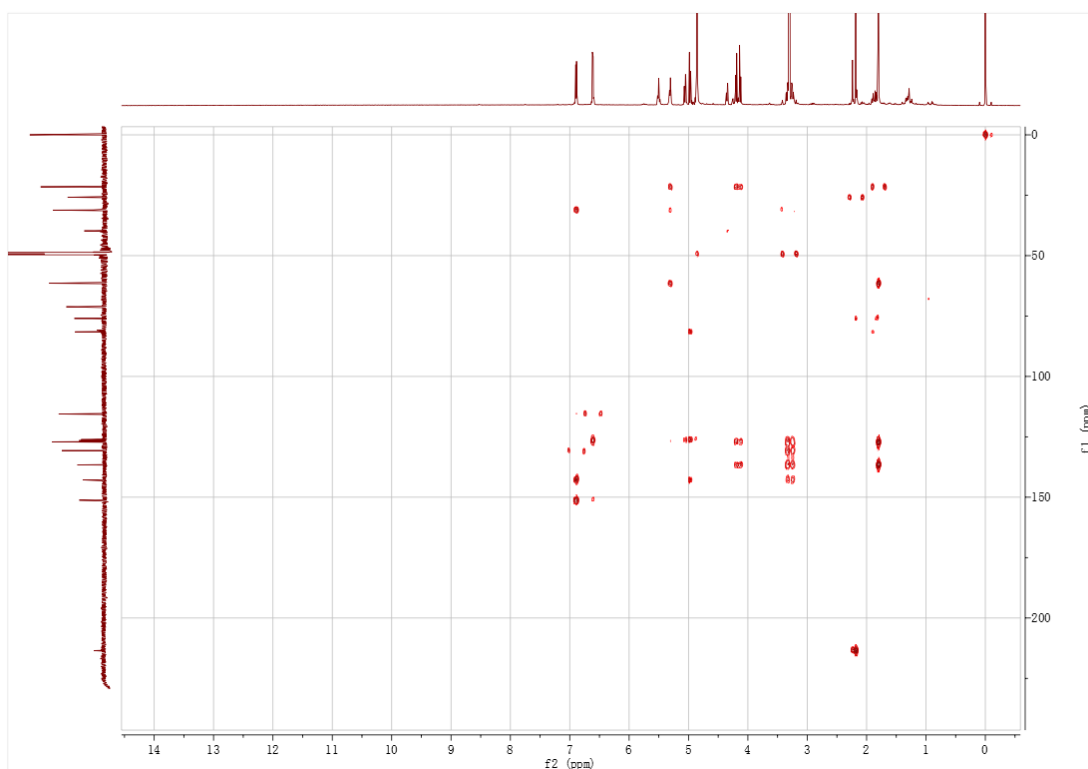

**Figure S19** HMBC spectrum of the compound **3** (CD<sub>3</sub>OD)

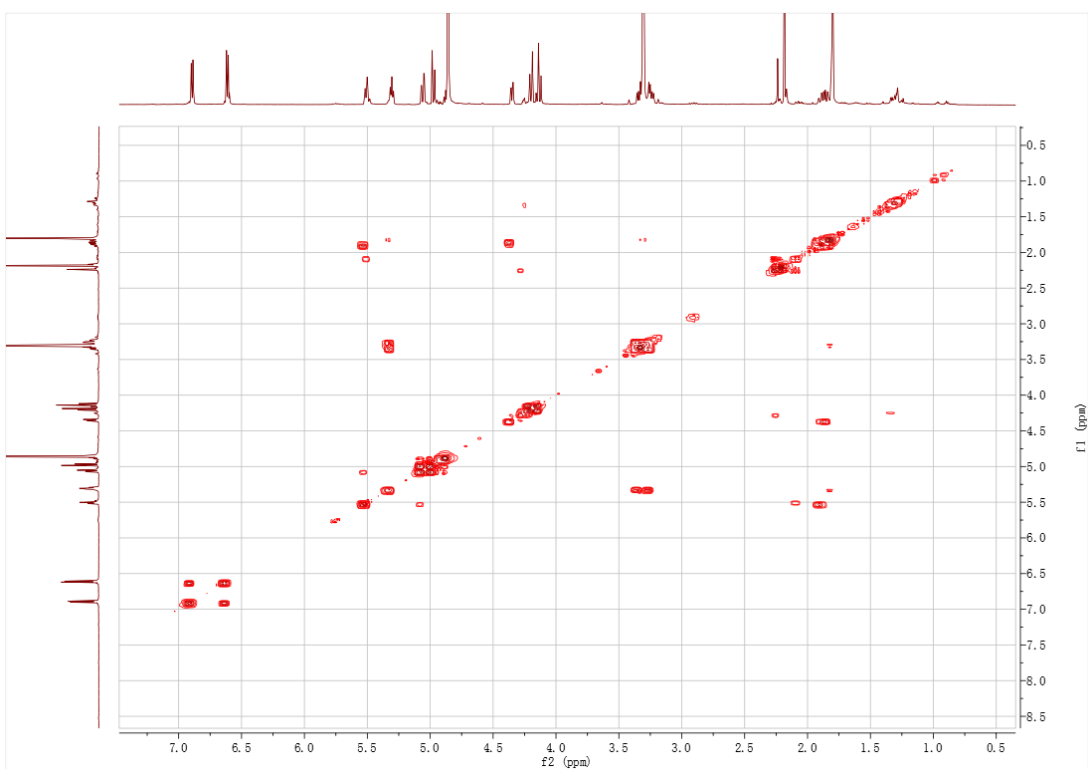

**Figure S20** COSY spectrum of the compound **3** (CD<sub>3</sub>OD)

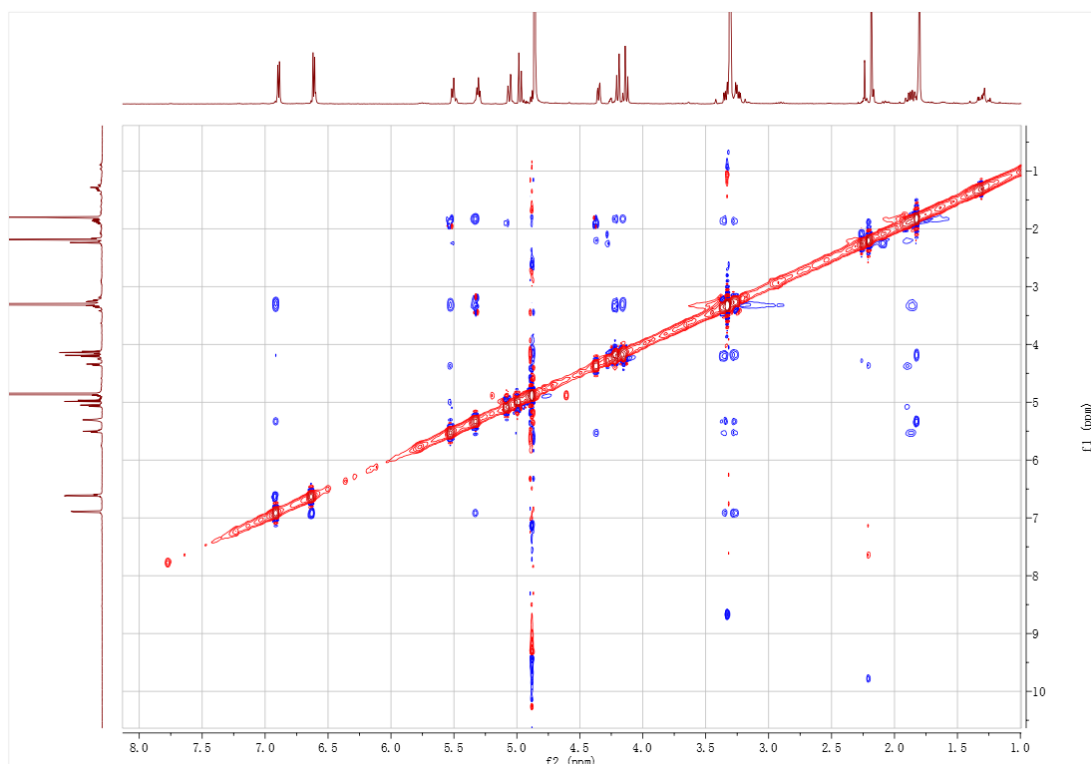

**Figure S21** NOESY spectrum of the compound **3** (CD<sub>3</sub>OD)

|                        |                                   |               |             |
|------------------------|-----------------------------------|---------------|-------------|
| Sample Type            | Unavailable                       | Position      | Unavailable |
| Instrument Name        | Unavailable                       | User Name     | Unavailable |
| Acq Method             |                                   | Acquired Time | Unavailable |
| IRM Calibration Status | Some Ions Missed                  | DA Method     | 2023.m      |
| Comment                | Sample information is unavailable |               |             |

#### User Spectra

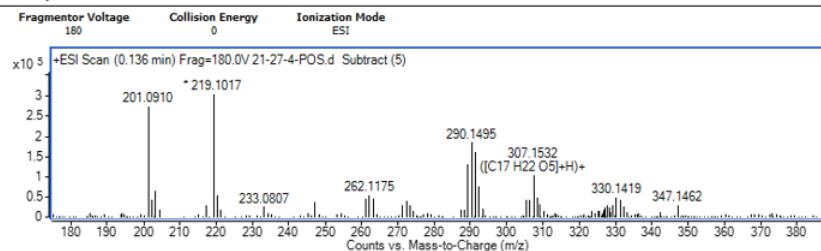

**Figure S22** HRESI-MS spectrum of the compound **4**

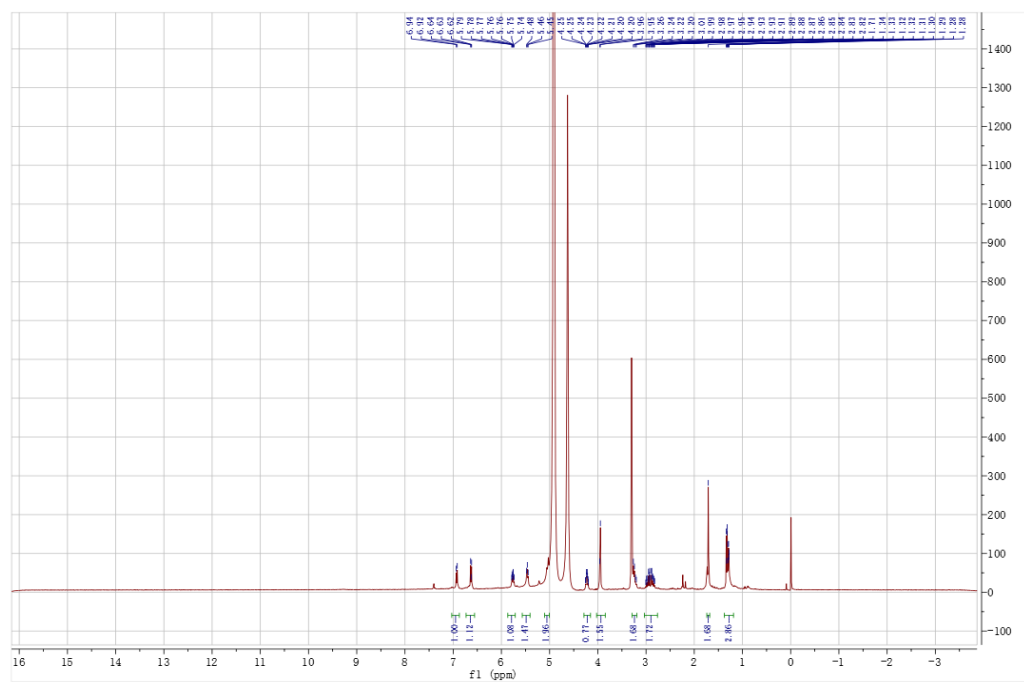

**Figure S23** <sup>1</sup>H NMR (600 MHz, CD<sub>3</sub>OD) spectrum of the compound **4**

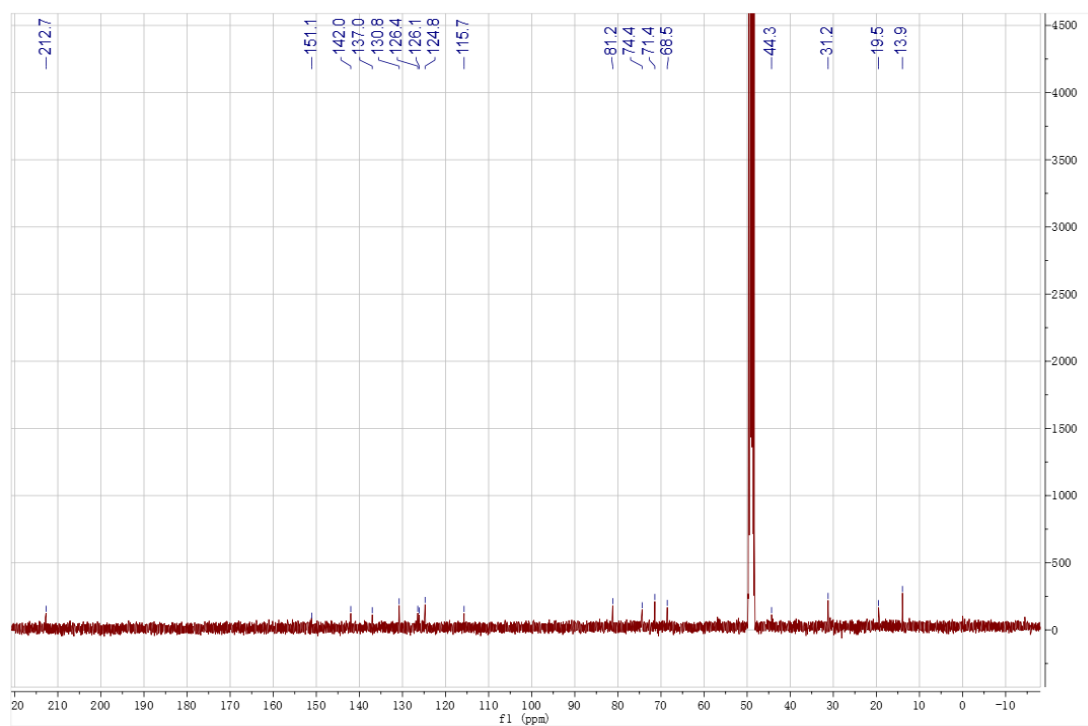

**Figure S24** <sup>13</sup>C NMR (150 MHz, CD<sub>3</sub>OD) spectrum of the compound **4**

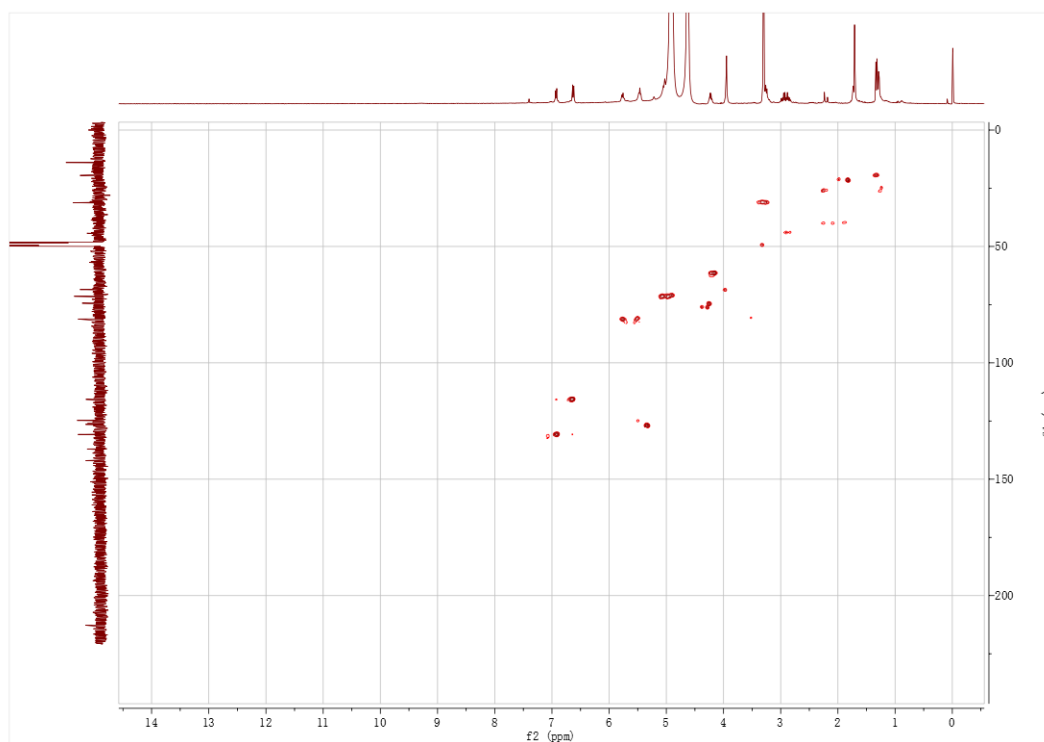

**Figure S25** HSQC spectrum of the compound **4** (CD<sub>3</sub>OD)

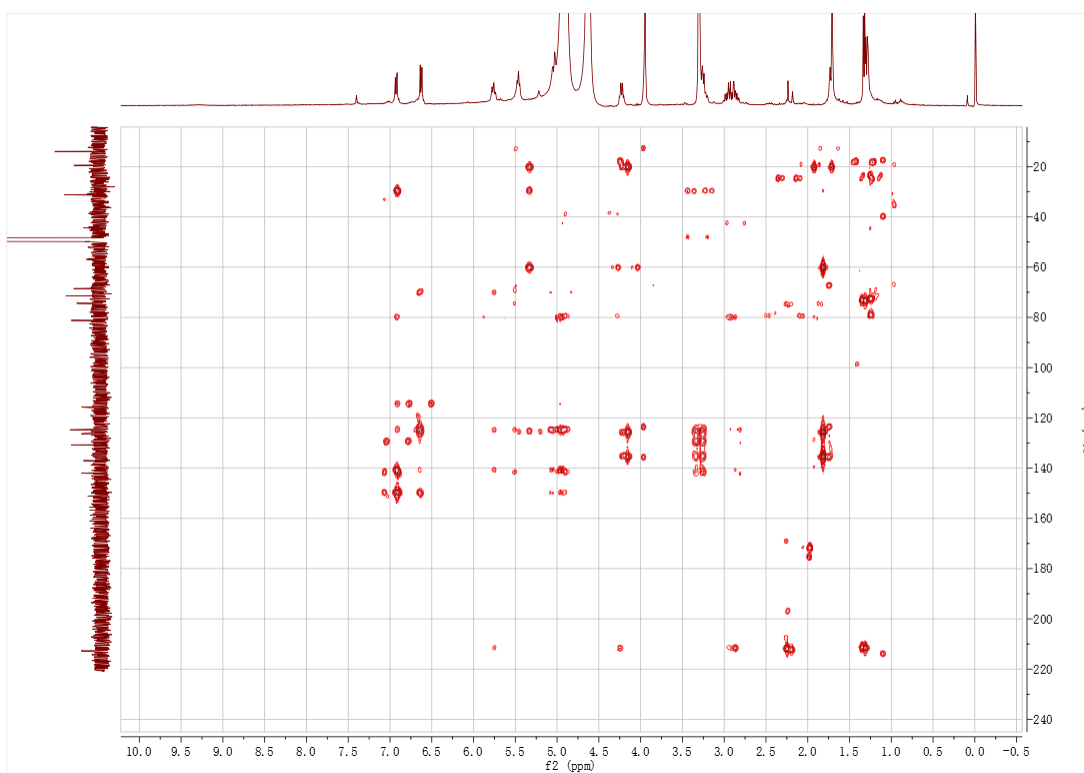

**Figure S26** HMBC spectrum of the compound **4** (CD<sub>3</sub>OD)

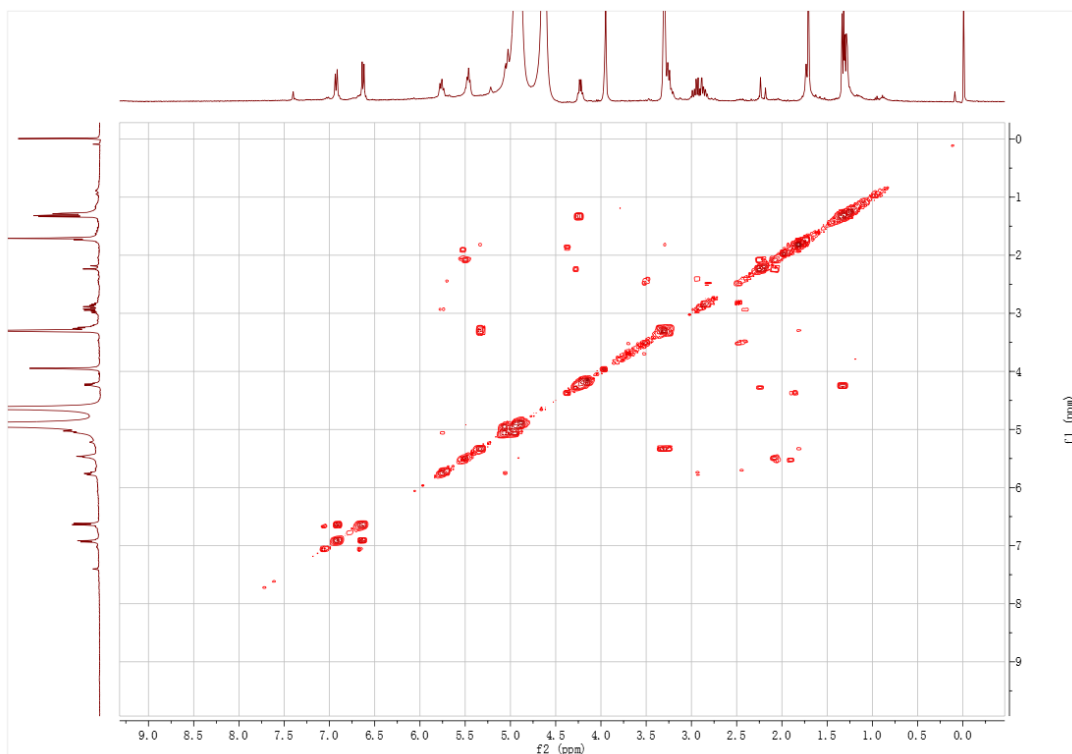

**Figure S27** COSY spectrum of the compound **4** (CD<sub>3</sub>OD)

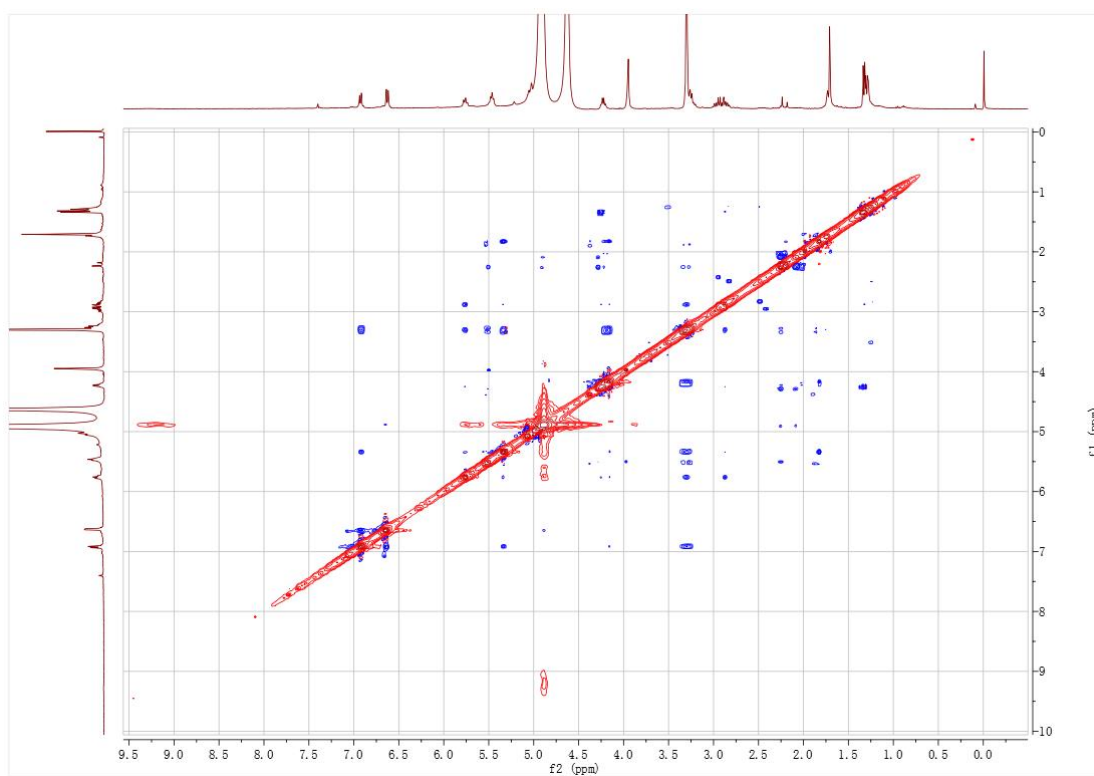

**Figure S28** NOESY spectrum of the compound **4** (CD<sub>3</sub>OD)

|                        |                                   |               |             |
|------------------------|-----------------------------------|---------------|-------------|
| Sample Type            | Unavailable                       | Position      | Unavailable |
| Instrument Name        | Unavailable                       | User Name     | Unavailable |
| Acq Method             |                                   | Acquired Time | Unavailable |
| IRM Calibration Status | Some Ions Missed                  | DA Method     | 2023.m      |
| Comment                | Sample information is unavailable |               |             |

#### User Spectra

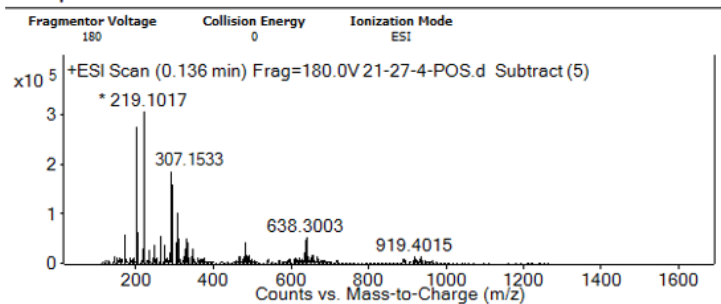

**Figure S29** HRESI-MS spectrum of the compounds **5/6**

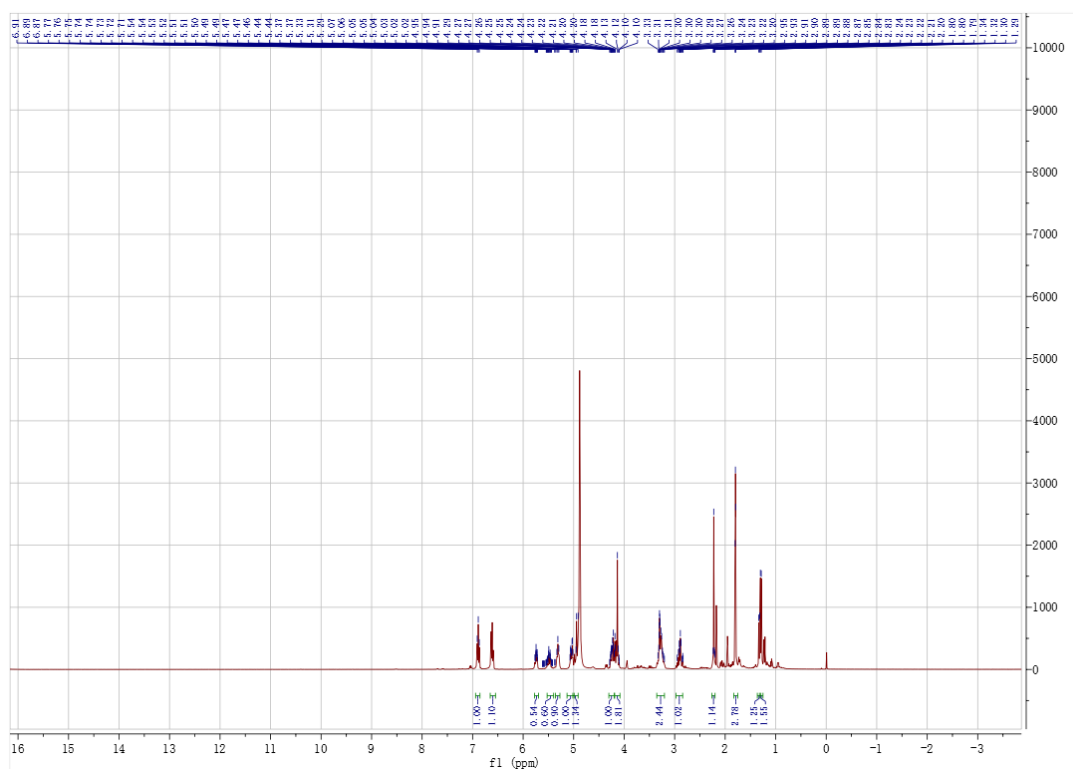

**Figure S30**  $^1\text{H}$  NMR (600 MHz,  $\text{CD}_3\text{OD}$ ) spectrum of the compounds **5/6**



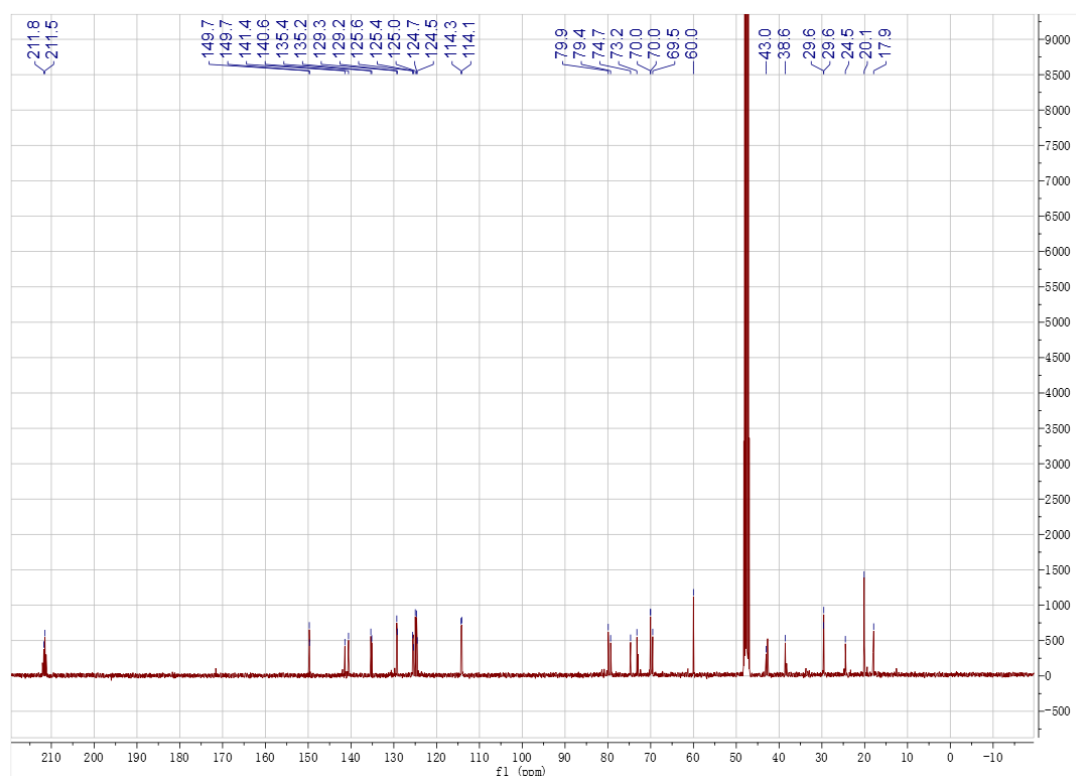

**Figure S31**  $^{13}\text{C}$  NMR (150 MHz,  $\text{CD}_3\text{OD}$ ) spectrum of the compounds **5/6**

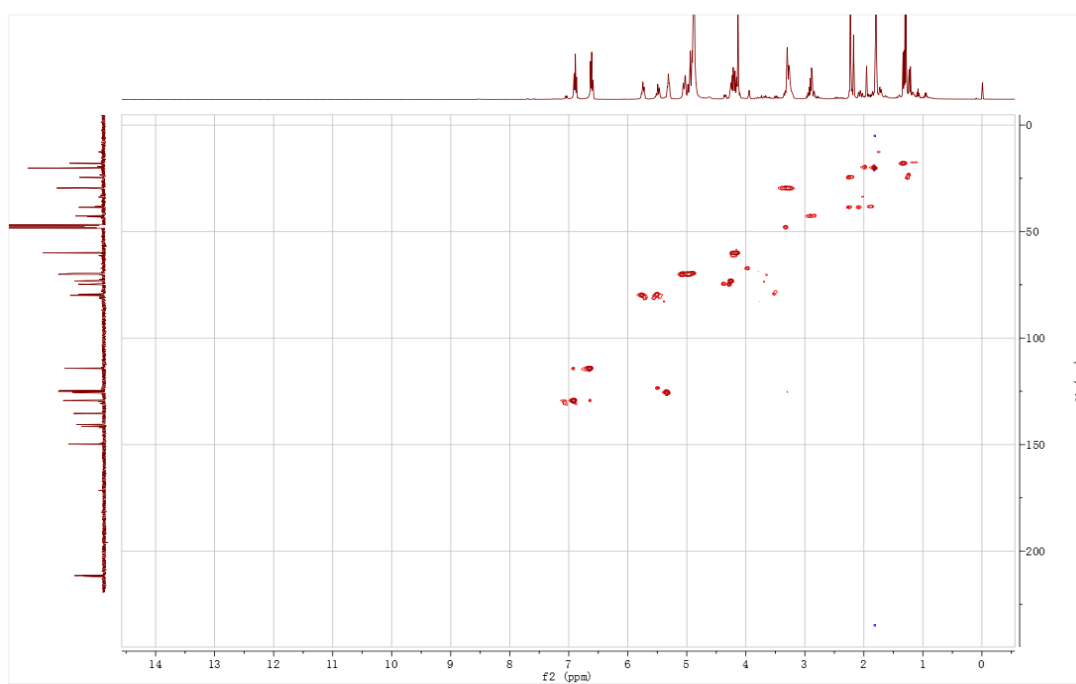

**Figure S32** HSQC spectrum of the compounds **5/6** ( $\text{CD}_3\text{OD}$ )

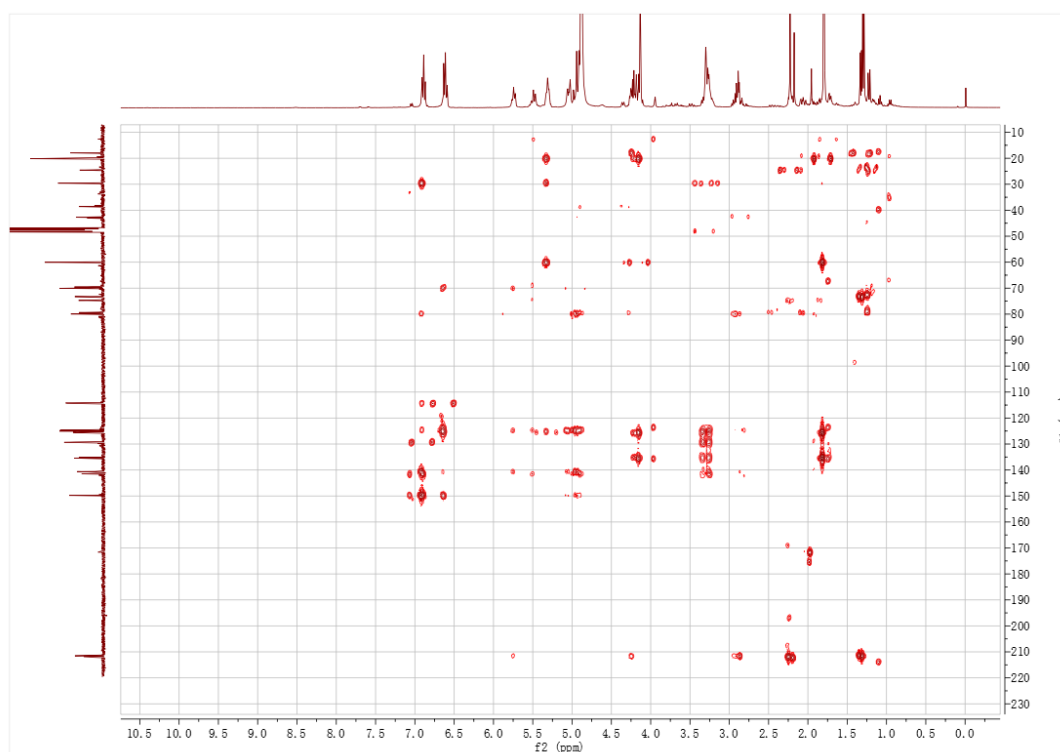

**Figure S33** HMBC spectrum of the compounds **5/6** (CD<sub>3</sub>OD)

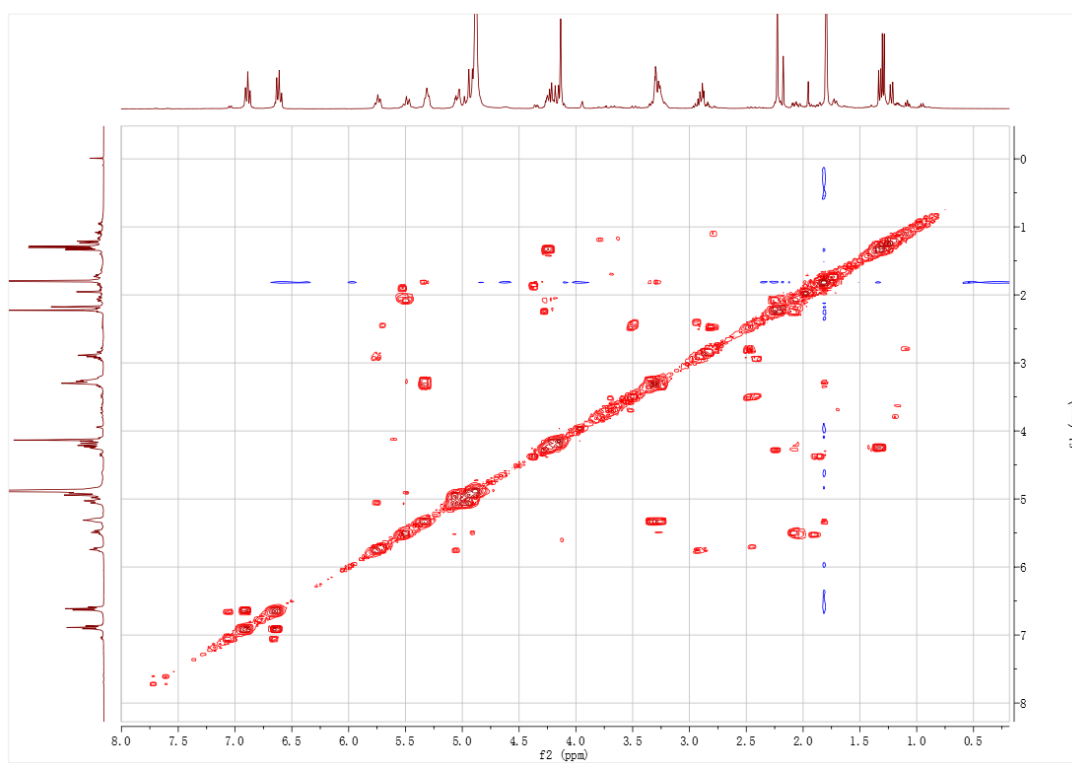

**Figure S34** COSY spectrum of the compounds **5/6** (CD<sub>3</sub>OD)

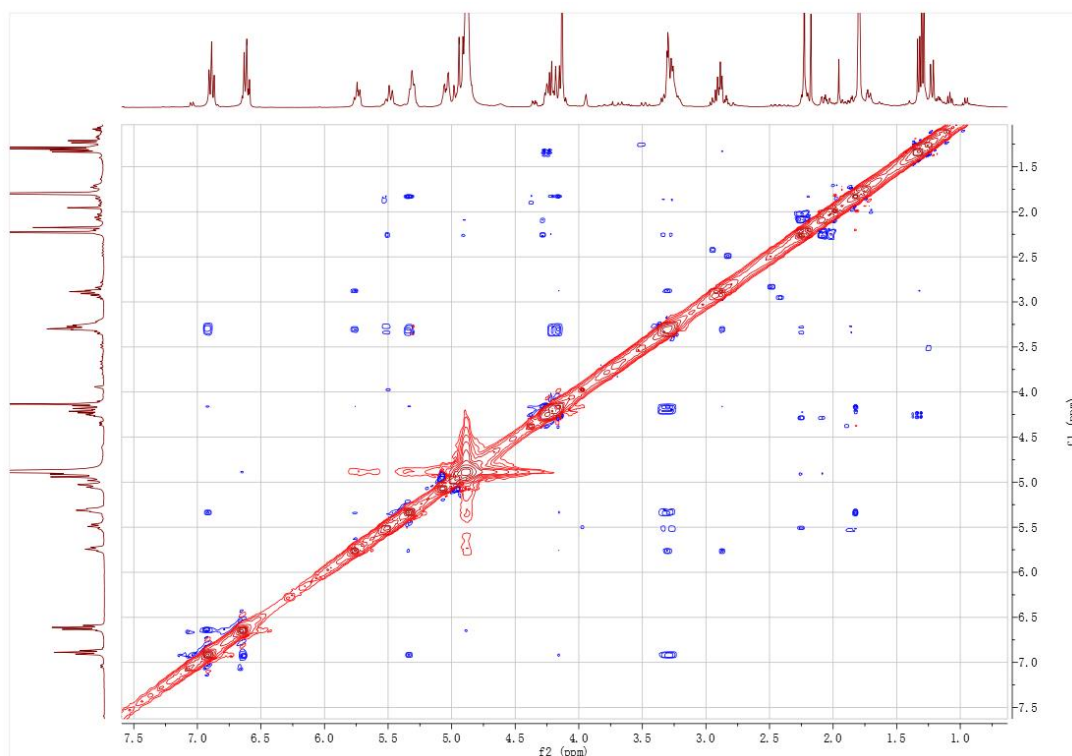

**Figure S35** NOESY spectrum of the compounds **5/6** ( $\text{CD}_3\text{OD}$ )

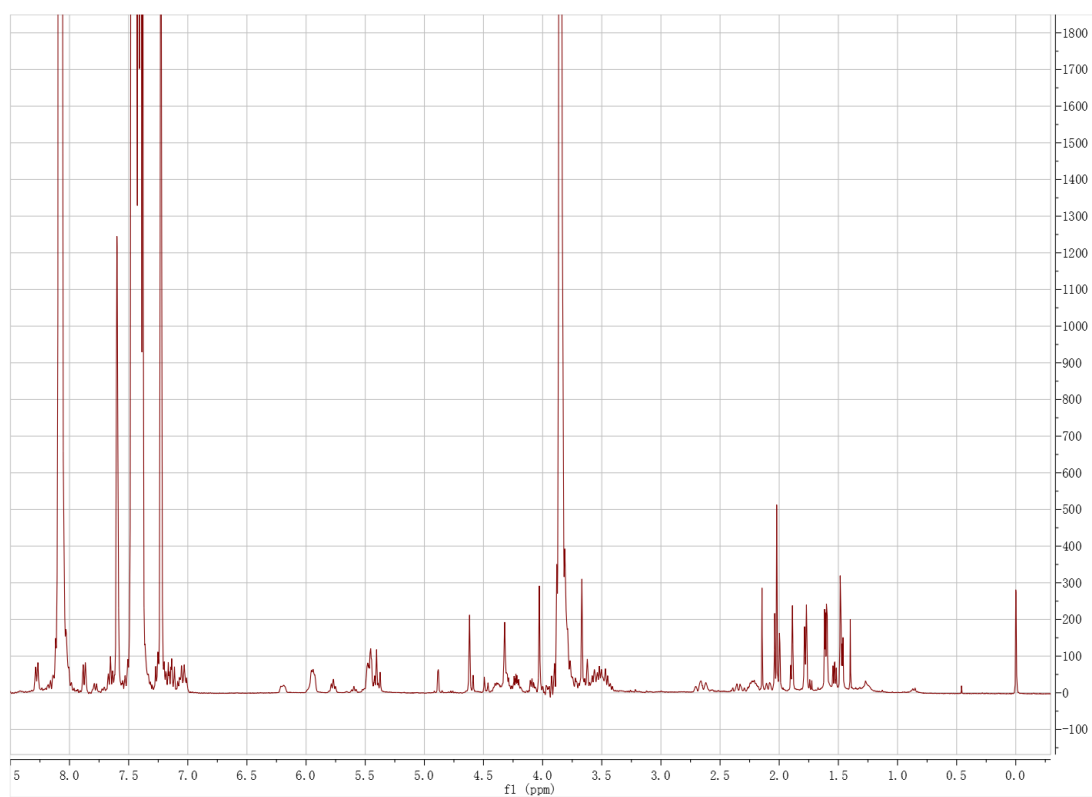

**Figure S36**  $^1\text{H}$  NMR spectrum of the compounds **2a** (400 MHz) ( $\text{pyridine-d}_6$ )

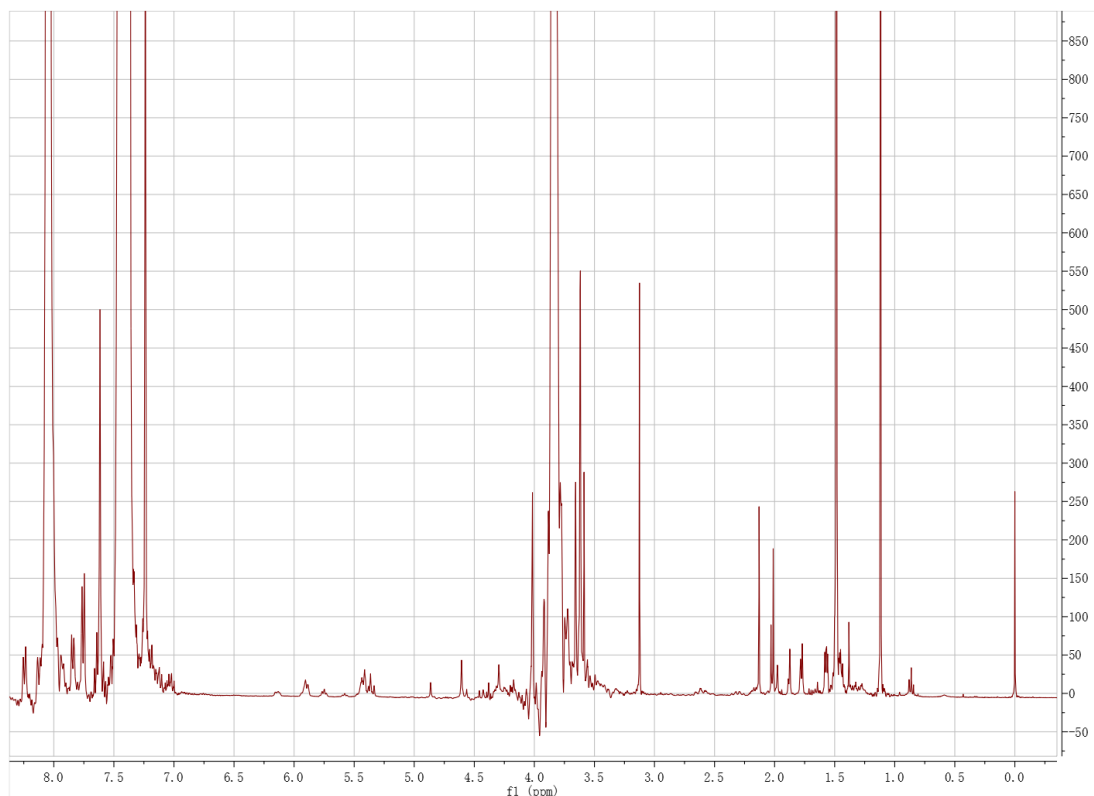

**Figure S37**  $^1\text{H}$  NMR spectrum of the compounds **2b** (400 MHz) (pyridine- $\text{d}_6$ )

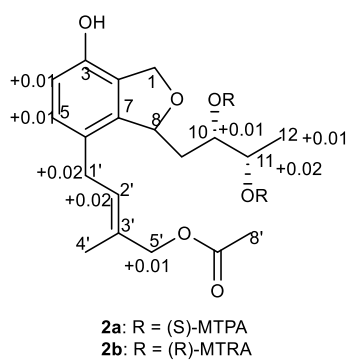

**Figure S38.** The  $\Delta\delta$  ( $\delta S - \delta R$ ) values from the (*S*)- and (*R*)-MTPA esters of **2**.
